# Supplementary figures and images for: A pathogenic human Orai1 mutation unmasks STIM1-independent rapid inactivation of Orai1 channels
Source: eLife journal article supplement (doi:10.7554/elife.82281), 2023-02-20

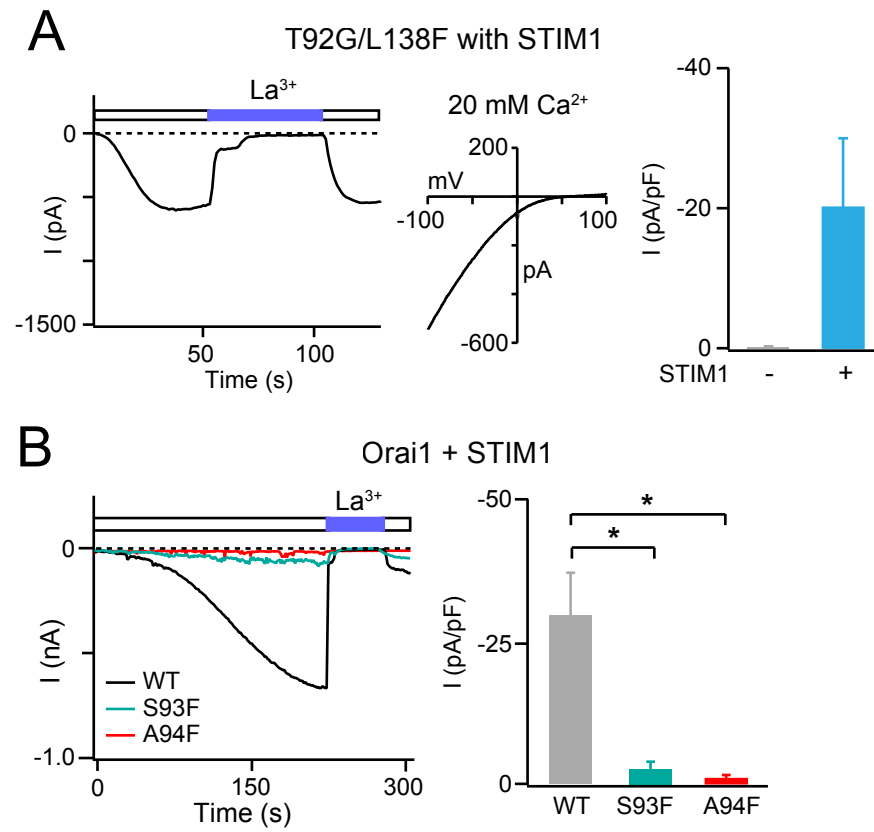

Figure 2 - Figure Supplement 1

Supplement: supp [file elife-82281-supp-v1.zip]

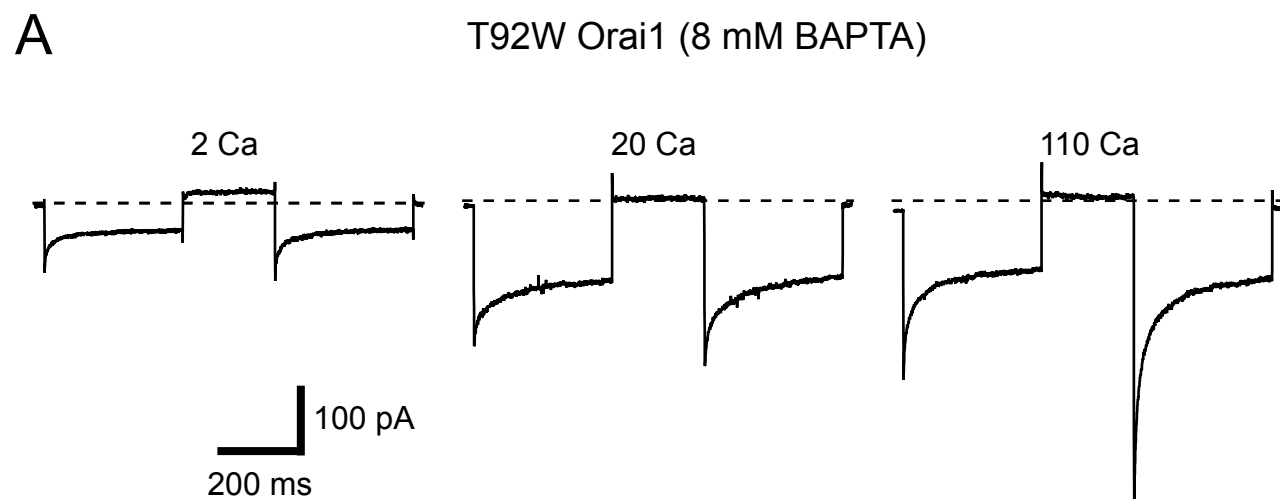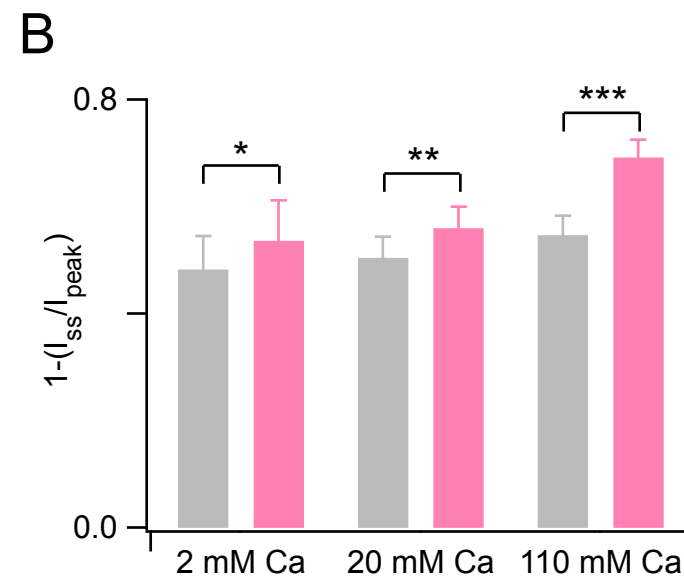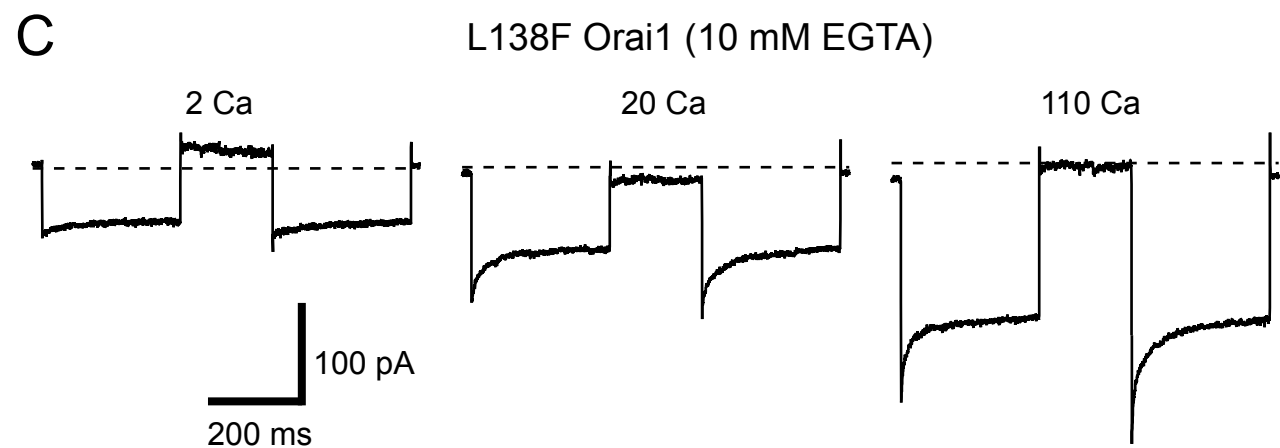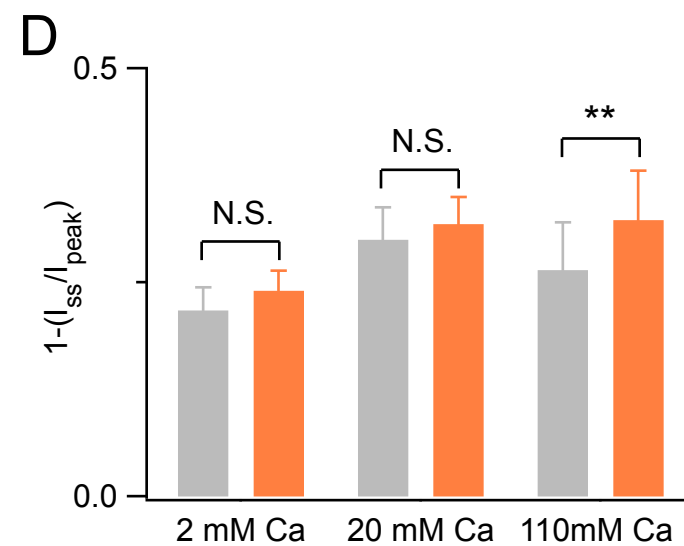

Figure 6 - Figure Supplement 1

Supplement: supp [file elife-82281-supp-v1.zip]

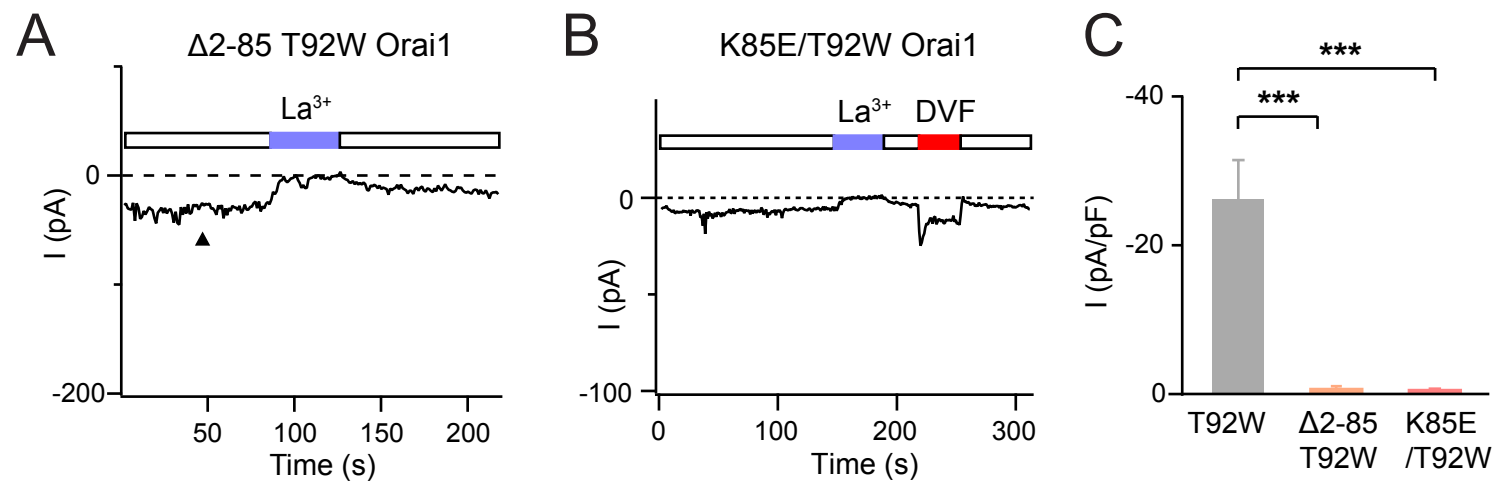

Figure 7 - Figure Supplement 1

Supplement: supp [file elife-82281-supp-v1.zip]

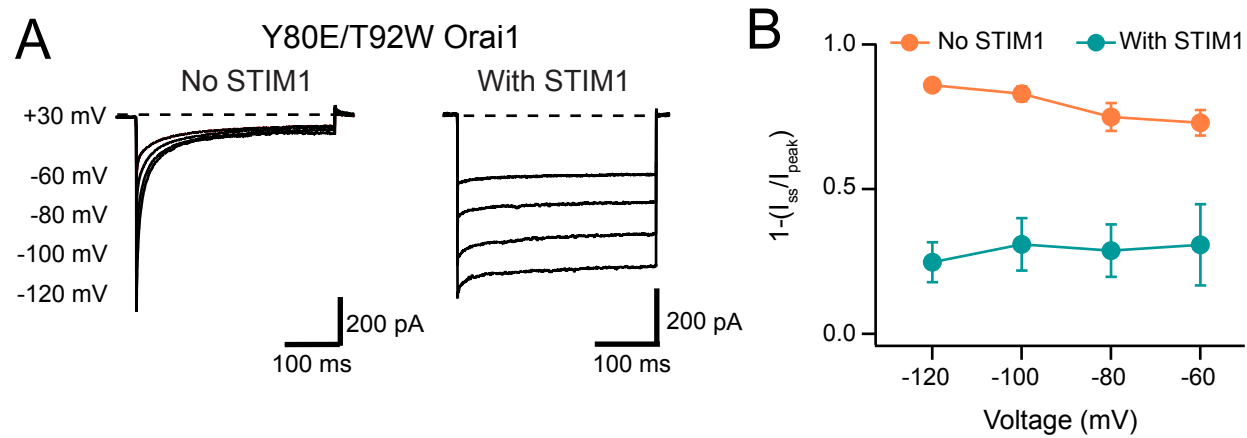

Figure 8 - Figure Supplement 1

Supplement: supp [file elife-82281-supp-v1.zip]

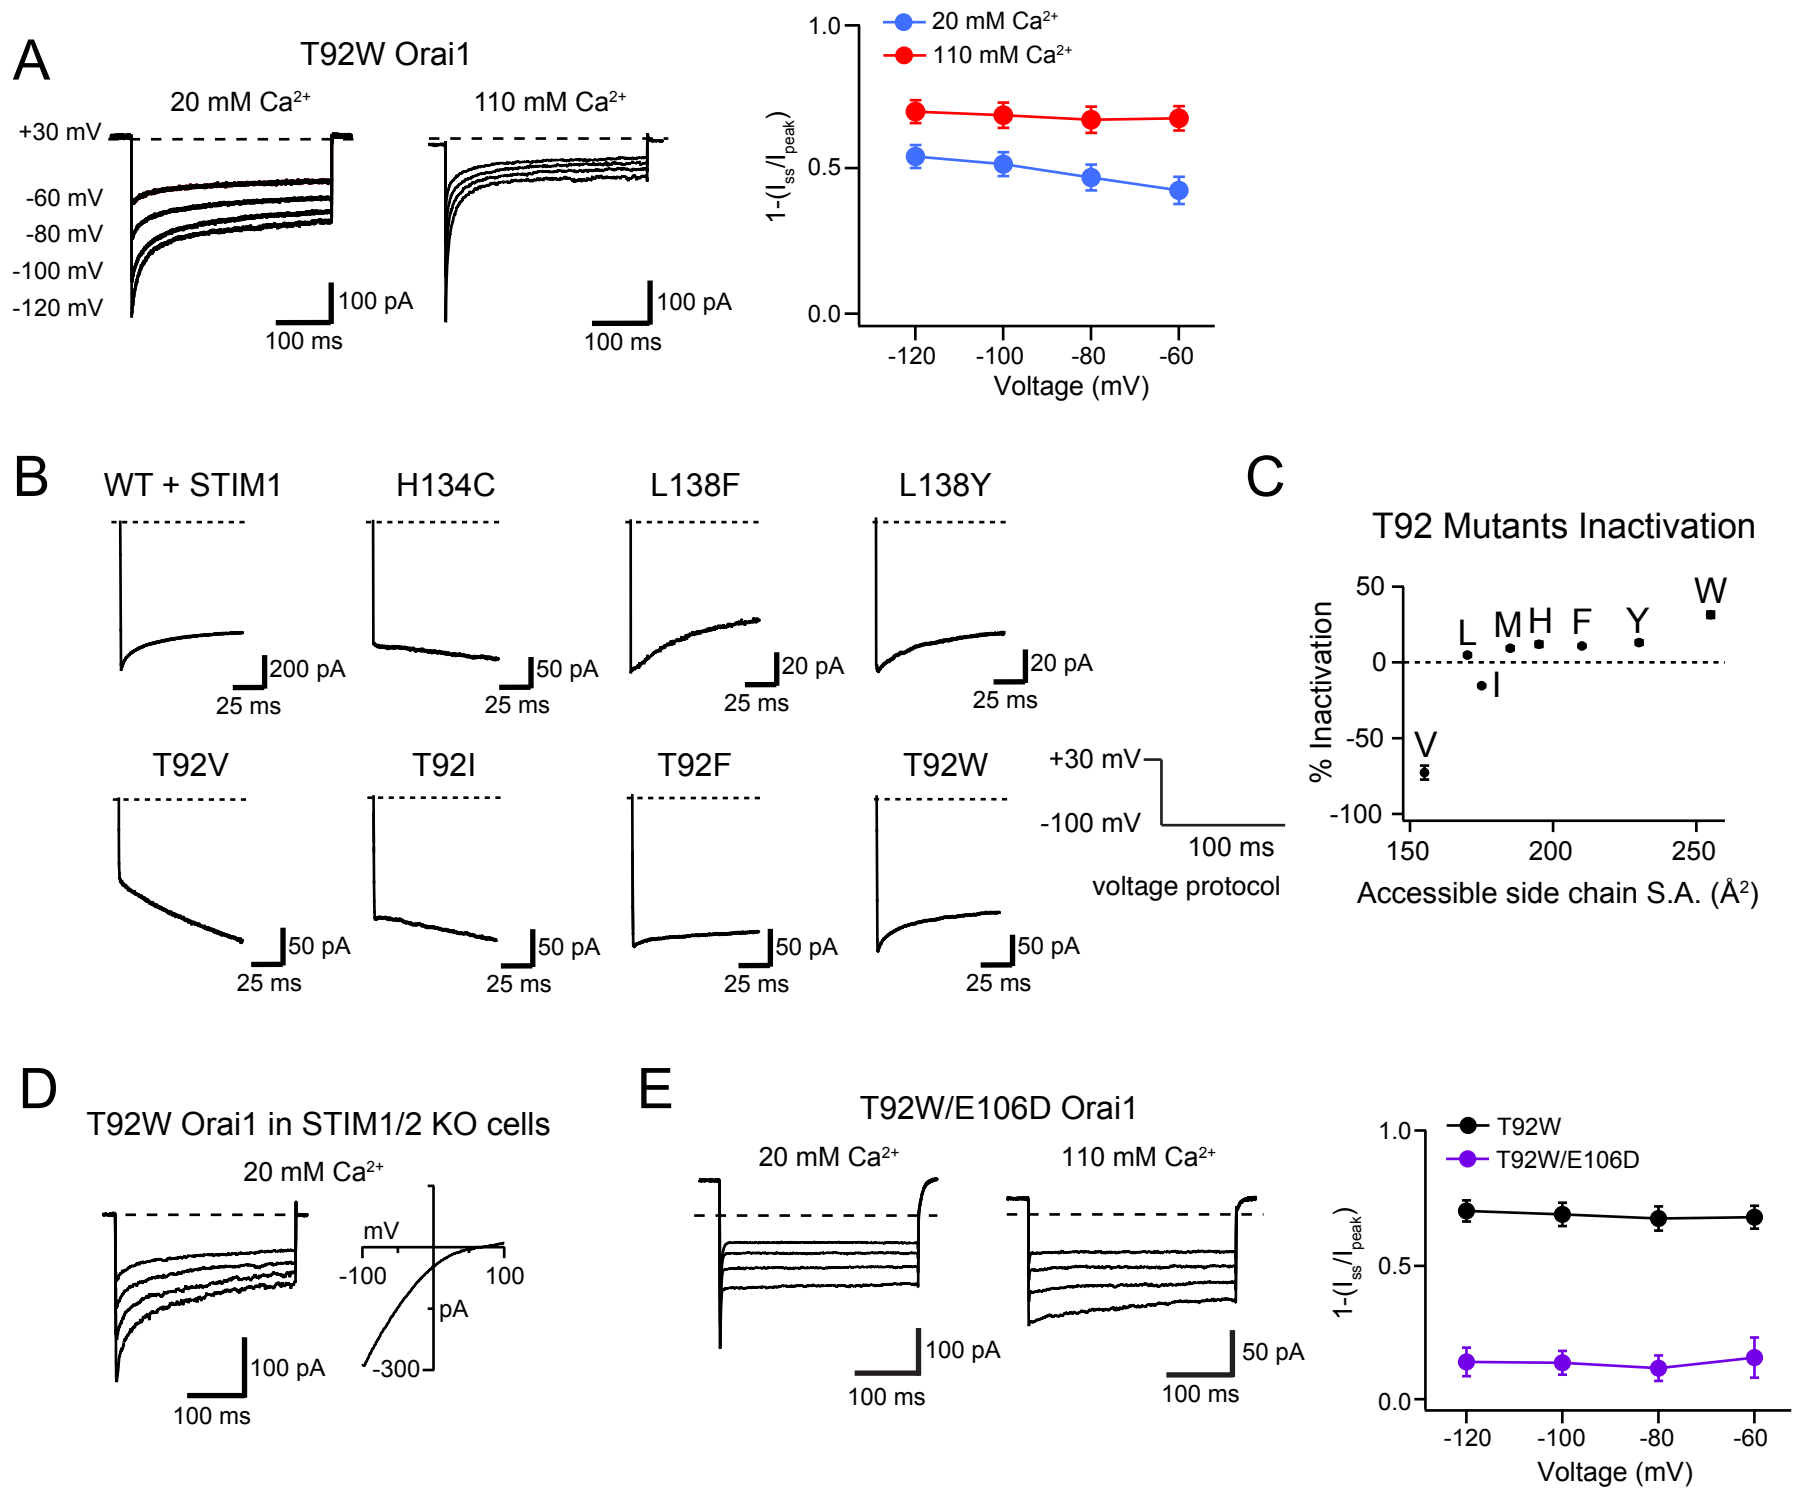

Figure 4 - Figure Supplement 1

Supplement: supp [file elife-82281-supp-v1.zip]

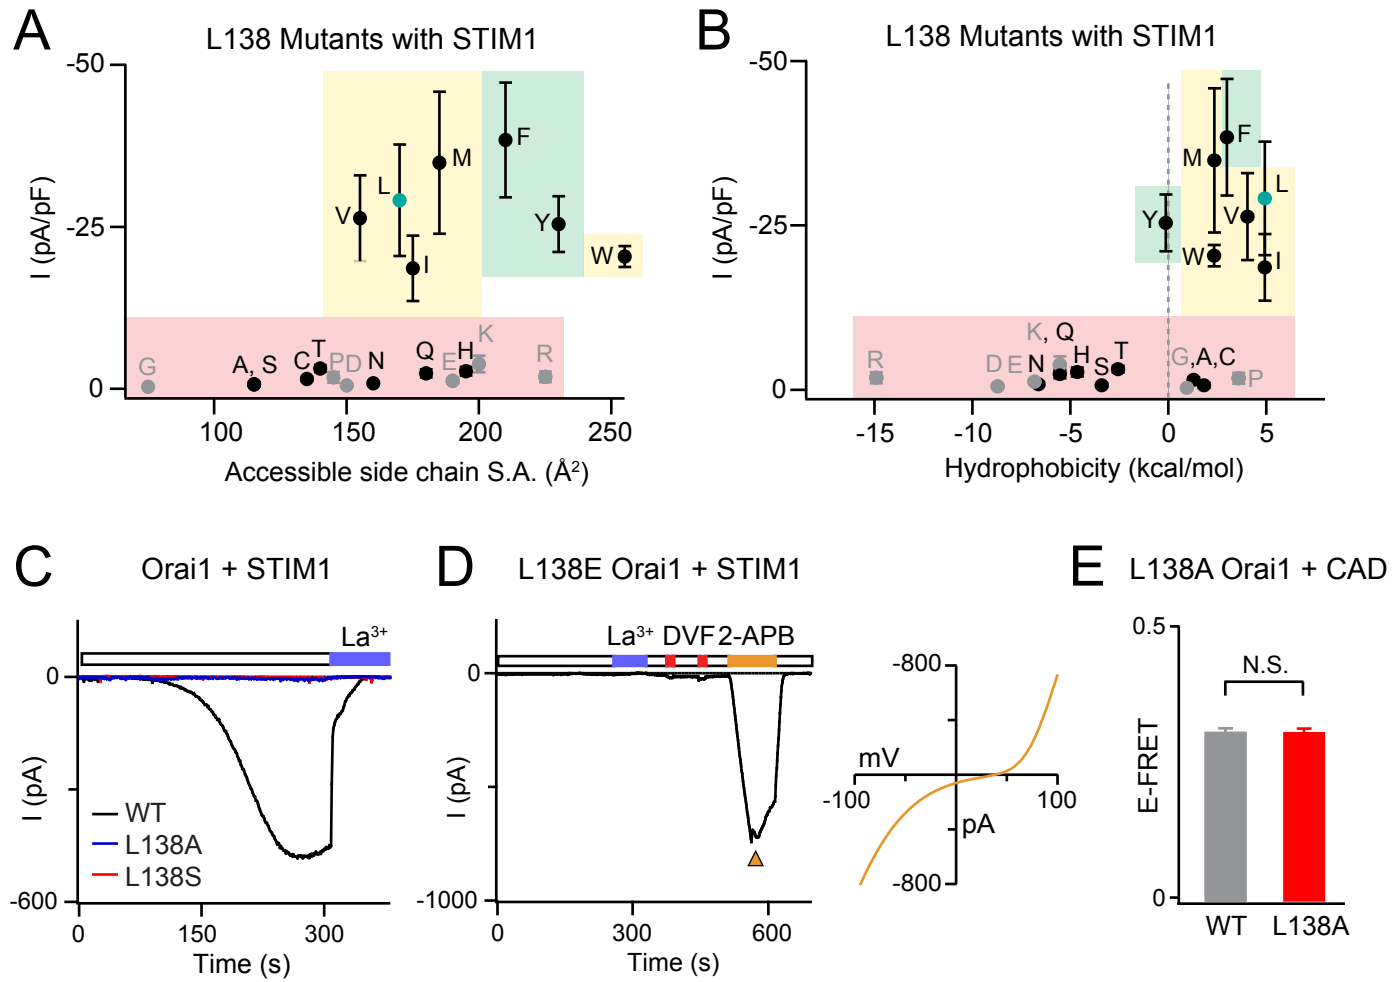

Supplement: supp [file elife-82281-supp-v1.zip]

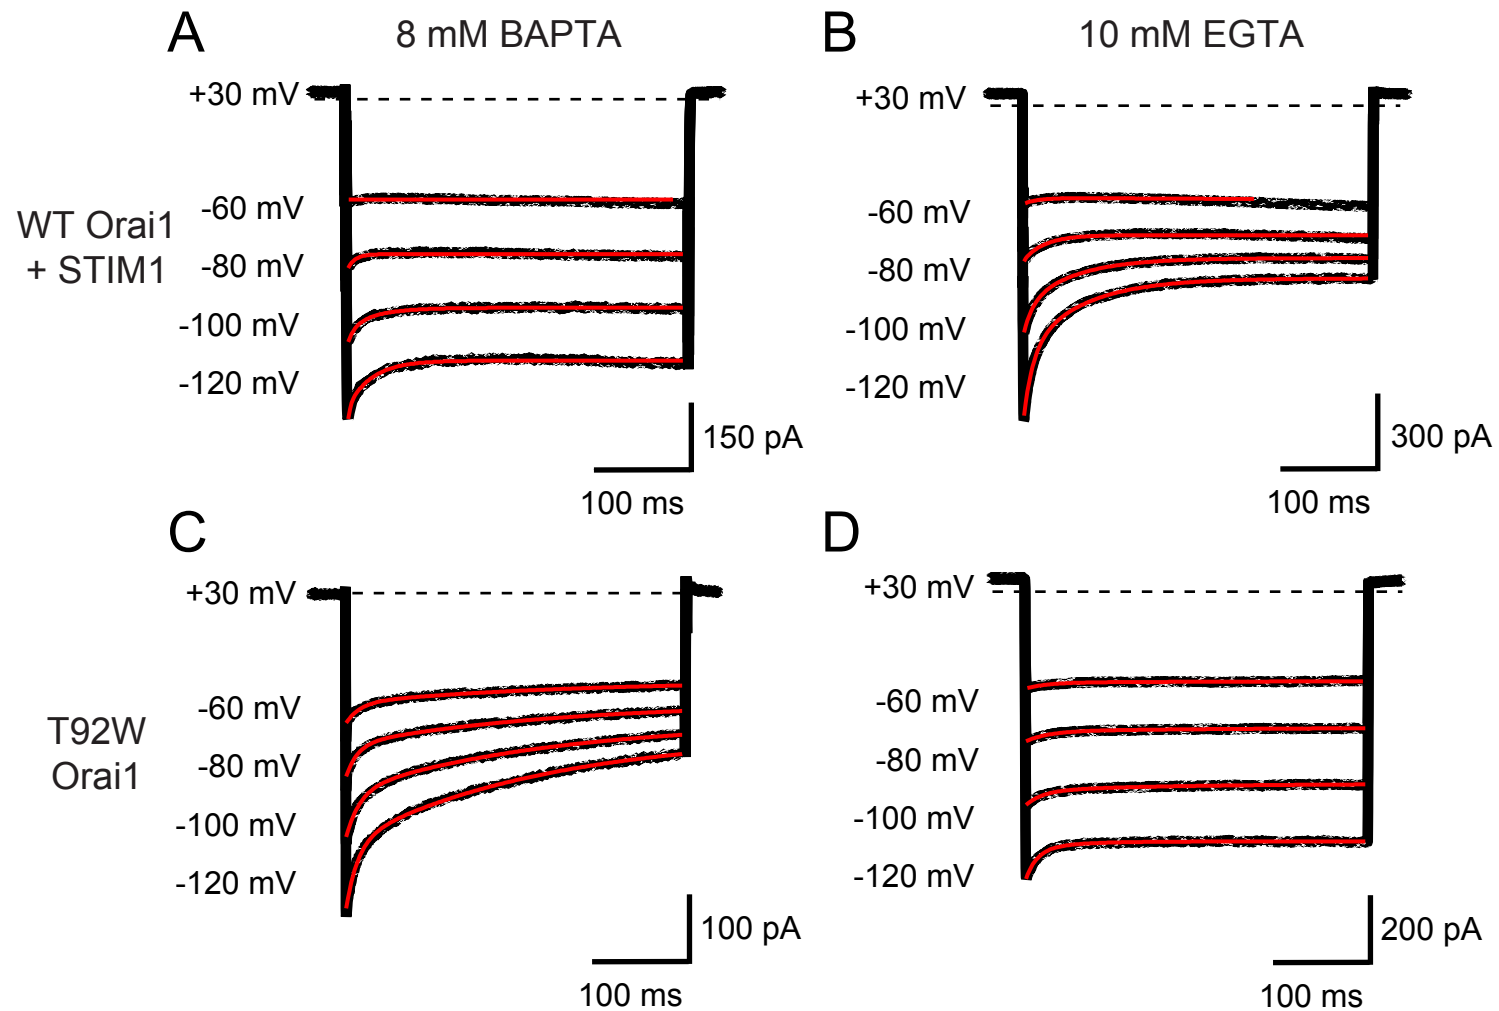

Figure 4 - Figure Supplement 2

Supplement: supp [file elife-82281-supp-v1.zip]

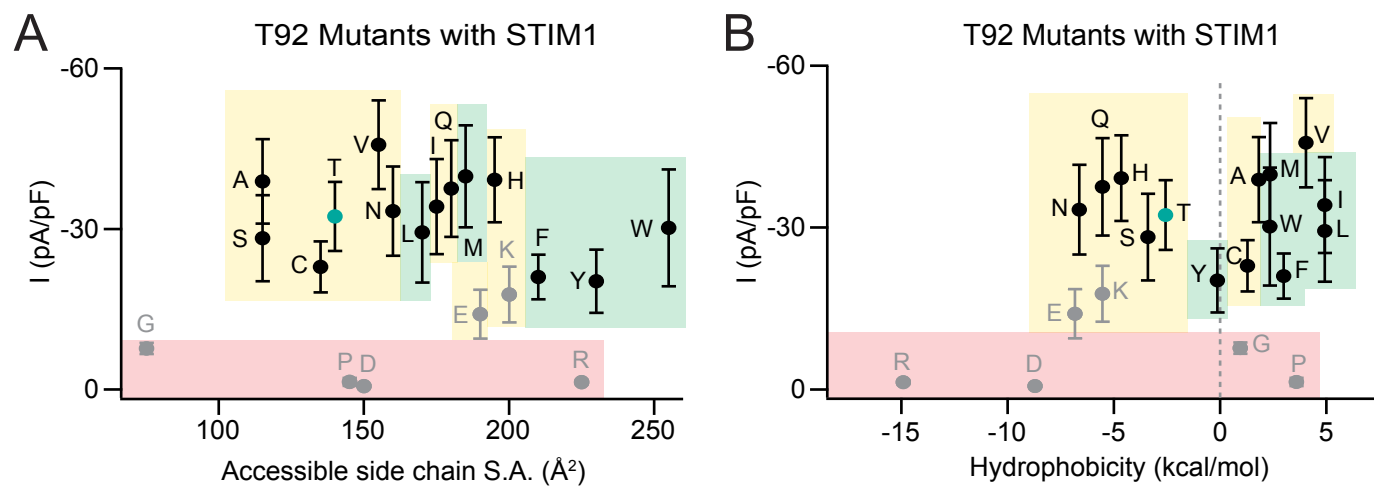

Figure 3 - Figure Supplement 1

Supplement: supp [file elife-82281-supp-v1.zip]
